# Supplementary material
Source: PubMed Central journal article supplement (PMC6440254)
Supplement: jamaneurol-76-56-s001.pdf [file jamaneurol-76-56-s001.pdf]

## Supplementary Online Content

Zalewski NL, Rabinstein AA, Krecke KN, et al. Characteristics of spontaneous spinal cord infarction and proposed diagnostic criteria. *JAMA Neurol*. Published online September 24, 2018. doi:10.1001/jamaneurol.2018.2734

**eBox 1.** Alternative acute myelopathy diagnoses

**eBox 2.** Typical SCI MRI findings

This supplementary material has been provided by the authors to give readers additional information about their work.

## eBox 1. Alternative acute myelopathy diagnoses

### **Spontaneous acute myelopathy**

#### **Intramedullary**

- Inflammatory: AQP4-IgG seropositive NMOSD, MOG-IgG demyelinating disease, multiple sclerosis, sarcoidosis, idiopathic transverse myelitis
- Infectious/post-infectious: acute flaccid myelitis, viral myelitis, HIV, syphilis, Lyme disease
- Vascular: hematomyelia, spinal DAVF, vasculitis
- Neoplasm: metastasis, tumor hemorrhage
- Toxic: nitrous oxide, heroin

#### **Extramedullary**

- Epidural hematoma, metastatic epidural compression, epidural abscess, severe spondylosis with minor trauma

### **Periprocedural acute myelopathy** (e.g. aortic surgery)

- Epidural hematoma, severe spondylosis

Abbreviations: AQP4, aquaporin-4; DAVF, dural arteriovenous fistula; HIV, human immunodeficiency virus; IgG, immunoglobulin G; MOG, myelin oligodendrocyte glycoprotein; NMOSD, neuromyelitis optica spectrum disorders.

## eBox 2. Typical SCI MRI findings

### LISTED FEATURES ARE NOT REQUIRED FOR CRITERIA

- T2 Axial
  - Anteromedial spot
  - Owl eyes
  - Anterior “U/V”
  - Holocord or hologrey
  - All signal confined to arterial territory (ASA or PSA)
  - Cystic myelomalacia (chronic)
- T2 Sagittal
  - Anterior “pencil-like” T2-hyperintensity
  - Longitudinally extensive lesion
  - Cystic myelomalacia (chronic)
- Gadolinium enhancement
  - Linear craniocaudal strip
  - Arterial territory (ASA or PSA)

Abbreviations: ASA, anterior spinal artery; PSA, posterior spinal artery.
